# Supplementary material
Source: PubMed Central journal article supplement (PMC3896615)
Supplement: 12263_2013_376_MOESM1_ESM.pdf [file 12263_2013_376_MOESM1_ESM.pdf]

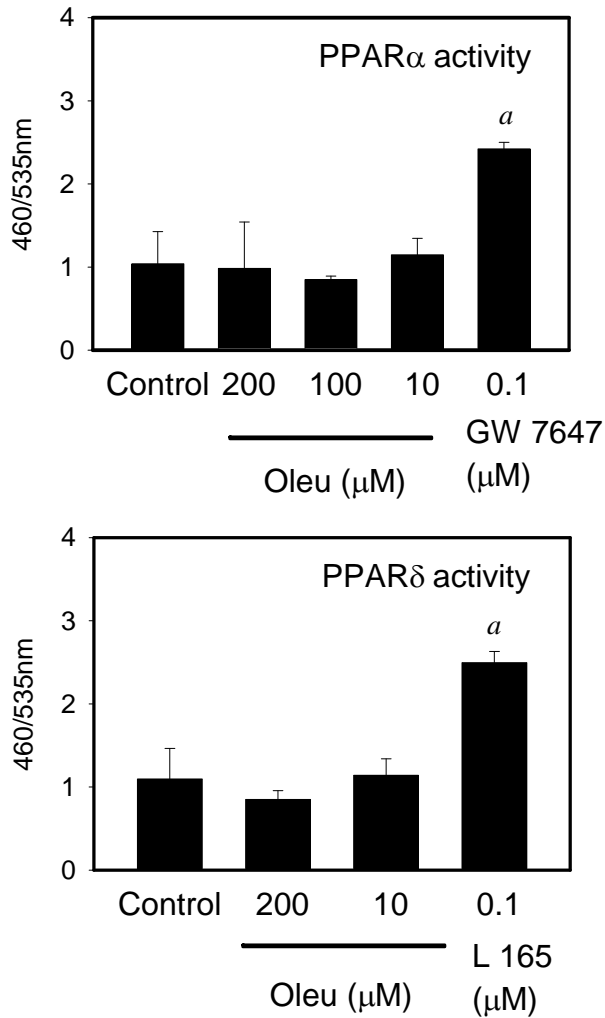

**Supplemental Fig. 1.** Cell based PPAR $\alpha$  (PPAR $\delta$ ) reporter-gene assay. Cells were incubated with oleuropein (Oleu) in concentration from 10 to 200 $\mu$ M at 37°C in a humidified 5% CO<sub>2</sub> for 16 hours. GW 7647 (L 165) was used as an activator PPAR $\alpha$  (PPAR $\delta$ ) in concentration 0.1  $\mu$ M.

<sup>a</sup> - Significant difference (ANOVA) compared with control .
